# Supplementary material for: Bionic nanotheranostic for multimodal imaging-guided NIR-II-photothermal cancer therapy
Source: Royal Society of Chemistry journal article supplement (doi:10.1039/d4nr00230j), 2024-01-01
Supplement: d4nr00230j1.pdf [file d4nr00230j1.pdf]

## Supplementary information

### **Bionic Nanotheranostic for Multimodal Imaging-Guided NIR-II-**

### **Photothermal Cancer Therapy**

Meng Zhang<sup>1, 2†</sup>, Yuxuan Zhang<sup>1, 3, 4†</sup>, Lifeng Hang<sup>2†</sup>, Tao Zhang<sup>5</sup>, Chuangcai Luo<sup>1, 4</sup>,  
Wuming Li<sup>2</sup>, Yiqiang Sun<sup>6</sup>, Hua Wen<sup>2</sup>, Yiyu Chen<sup>2</sup>, Guihua Jiang<sup>1, 2\*</sup> and Xiaofen Ma<sup>2\*</sup>

<sup>1</sup> The Second School of Clinical Medicine, Southern Medical University, Guangzhou 510282, China.

<sup>2</sup> The Department of Medical Imaging, Guangzhou Key Laboratory of Molecular Functional Imaging and Artificial Intelligence for Major Brain Diseases, Guangdong Second Provincial General Hospital, Guangzhou 510317, China

<sup>3</sup> Department of Neurosurgery, Institute of Neuroscience, The Second Affiliated Hospital of Guangzhou Medical University, Guangzhou, 510260, China.

<sup>4</sup> The National Key Clinical Specialty, Department of Neurosurgery, Zhujiang Hospital, Southern Medical University, Guangzhou 510282, China.

<sup>5</sup> School of Physical and Mathematical Sciences, Nanyang Technological University, 21 Nanyang Link, Singapore 637371, Singapore.

<sup>6</sup> School of Chemistry and Chemical Engineering, University of Jinan, Jinan 250022, China

† Contributed equally

\* Corresponding author

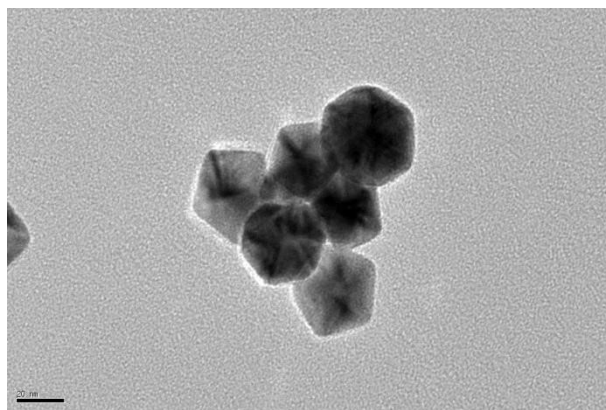

**Fig. S1.** TEM image of gold decahedron (scale bar: 20 nm).

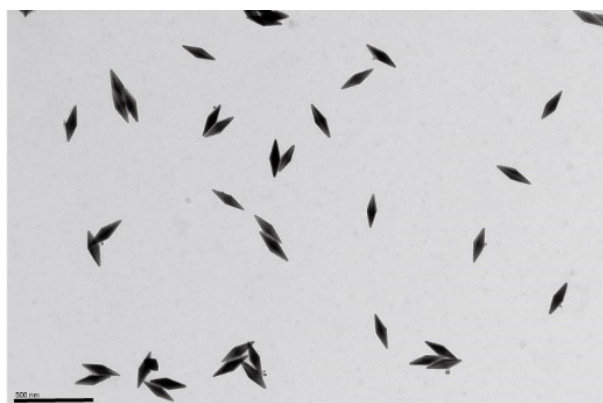

**Fig. S2.** TEM image of Au NBP (scale bar: 500 nm).

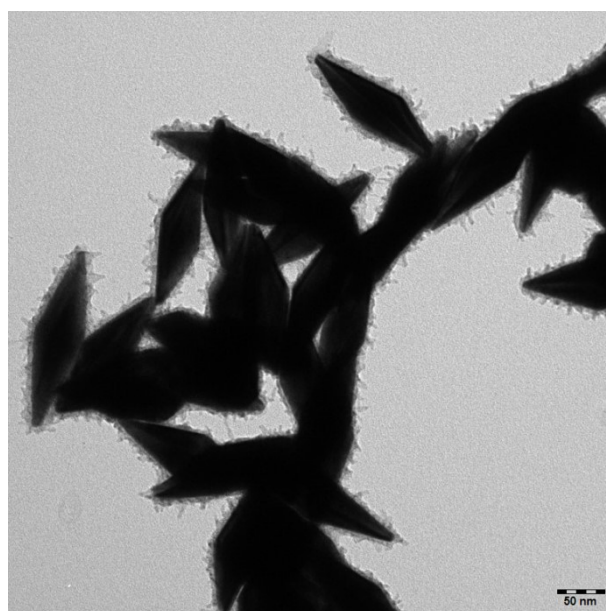

**Fig. S3.** TEM image of Au@MnO<sub>2</sub> (scale bar: 50 nm).

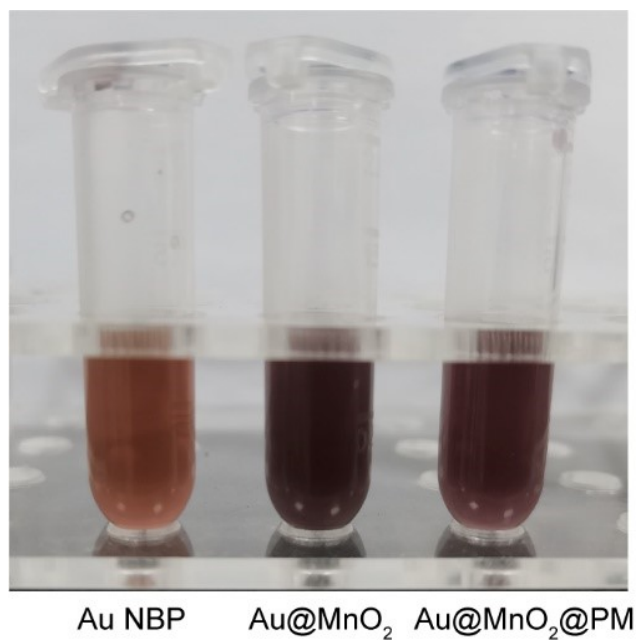

**Fig. S4.** Digital image of Au NBP (left), Au@MnO<sub>2</sub> (middle) and Au@MnO<sub>2</sub>@PM (right).

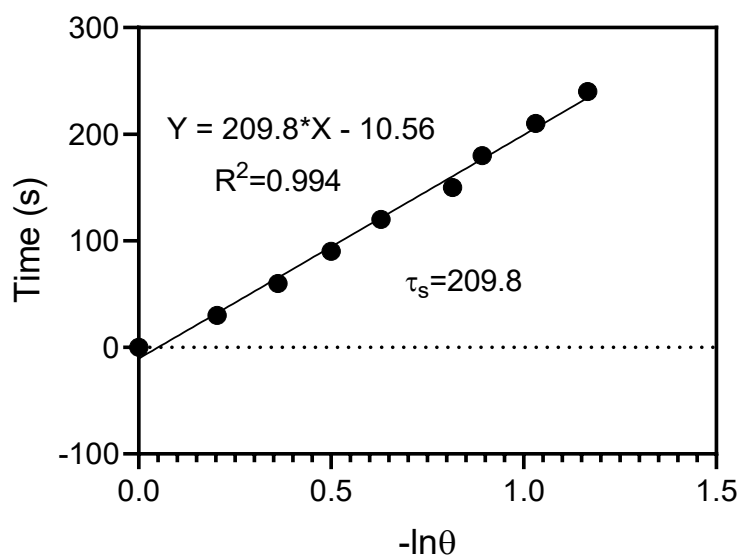

**Fig. S5.** Calculation of photothermal conversion efficiency ( $\eta$ ) of AMP.

#### Calculation of the Photothermal Conversion Efficiency.

Following Roper's report (J. Phys. Chem. C 2007, 111, 3636), the total energy balance for

the system can be expressed by Eq. 1:

$$\Sigma_i m_i C_{p,i} \frac{dT}{dt} = Q_{NC} + Q_{Dis} - Q_{surr} \quad (1)$$

Where  $m$  and  $C_p$  are the mass and heat capacity of water, respectively,  $T$  is the solution temperature,  $Q_{NC}$  is the energy inputted by NCs,  $Q_{Dis}$  is the baseline energy inputted by the sample cell, and  $Q_{surr}$  is heat conduction away from the system surface by air.

The laser-induced source term, represents heat dissipated by electron-phonon relaxation of the plasmons on the AMP surface under the irradiation of 1064 nm laser:

$$Q_{NC} = I(1 - A^{-1064})\eta \quad (2)$$

Where  $I$  is incident laser power,  $\eta$  is the conversion efficiency from incident laser energy to thermal energy, and  $A_{1064}$  is the absorbance of the AMP at wavelength of 1064 nm. In addition, source term,  $Q_{Dis}$ , expresses heat dissipated from light absorbed by the quartz sample cell itself, and it was measured independently to be 113.75 mW using a quartz cuvette cell containing pure water without any AMP.  $Q_{surr}$  is linear with temperature for the outgoing thermal energy, as given by Eq. 3

$$Q_{surr} = hS(T - T_{surr}) \quad (3)$$

Where  $h$  is heat transfer coefficient,  $S$  is the surface area of the container, and  $T_{surr}$  is ambient temperature of the surroundings.

Once the laser power is defined, the heat input ( $Q_{NC} + Q_{Dis}$ ) will be finite. Since the heat output ( $Q_{surr}$ ) is increased along with the increase of the temperature according to the Eq. 3, the system temperature will rise to a maximum when the heat input is equal to heat output:

$$Q_{NC} + Q_{Dis} = Q_{surr-max} = hS(T_{max} - T_{surr}) \quad (4)$$

Where the  $Q_{surr-max}$  is heat conduction away from the system surface by air when the

sample cell reaches the equilibrium temperature, and  $T_{max}$  is the equilibrium temperature.

The 1064 nm laser heat conversion efficiency ( $\eta$ ) can be determined by substituting Eq. 2

for  $Q_{NC}$  into Eq. 4 and rearranging to get

$$\eta = \frac{hS(T_{max} - T_{surr}) - Q_{Dis}}{I(1 - 10^{-A_{1064}})} \quad (5)$$

Where  $Q_{Dis}$  was measured independently to be 113.75 mW, the  $(T_{max} - T_{Surr})$  was 24.4 °C

according to Figure 1G and 1H,  $I$  is 785 mW,  $A_{1064}$  is the absorbance (1) of AMP at 1064 nm (Figure 1F). Thus, only the  $hS$  remains unknown for calculating  $\eta$ .

In order to get the  $hS$ , a dimensionless driving force temperature,  $\theta$  is introduced using the maximum system temperature,  $T_{max}$

$$\theta = \frac{T - T_{surr}}{T_{max} - T_{surr}} \quad (6)$$

and a sample system time constant  $\tau_s$ ,

$$\tau_s = \frac{\sum_i m_i C_{p,i}}{hS} \quad (7)$$

which is substituted into Eq. 1 and rearranged to yield

$$\frac{d\theta}{dt} = \frac{1}{\tau_s} \left[ \frac{Q_{NC} + Q_{Dis}}{hS(T_{max} - T_{surr})} - \theta \right] \quad (8)$$

At the cooling stage of the aqueous dispersion of the AMP, the light source was shut off,

the  $Q_{NC} + Q_{Dis} = 0$ , reducing the Eq. 9

$$dt = -\tau_s \frac{d\theta}{\theta} \quad (9)$$

and integrating, giving the expression

$$\tau = -\tau_s \ln \theta \quad (10)$$

finally, find the value of photothermal conversion efficiency ( $\eta$ )

$$\eta = \frac{hS(T_{max} - T_{surr}) - Q_{Dis}}{I(1 - 10^{-A_{1064}})} = \frac{(20.16 \times 24.4 \text{ mW} - 113.7 \text{ mW})}{(785 \text{ mW} \times (1 - 10^{-1.0804}))} = 52.07\%$$

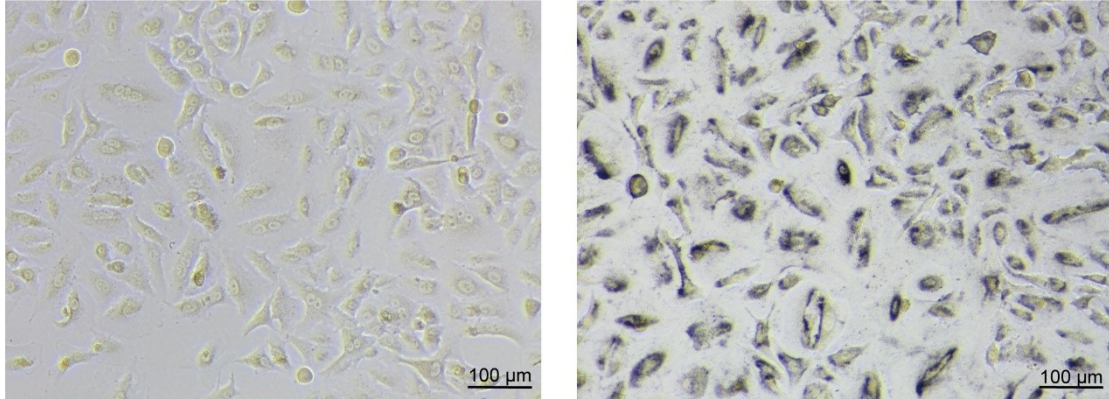

**Fig. S6.** Optical microscopy images were taken 24 hours after the addition of PBS (left) and AMP (right) to A549 cell culture medium. Scale bar: 100 µm

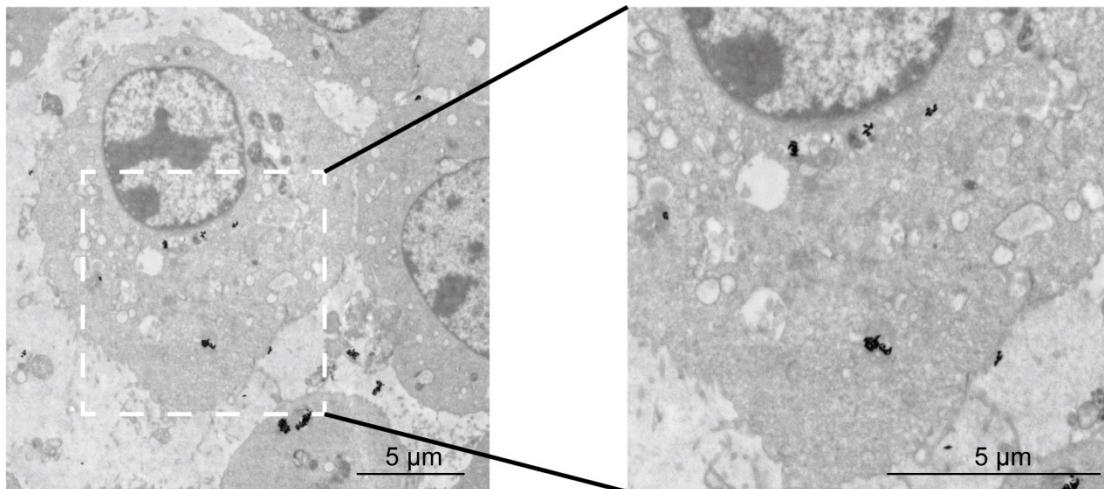

**Fig. S7.** Low magnification (left) and high magnification (right) images of AMP uptake by A549 cells obtained by transmission electron microscopy. Scale bar: 5 µm.

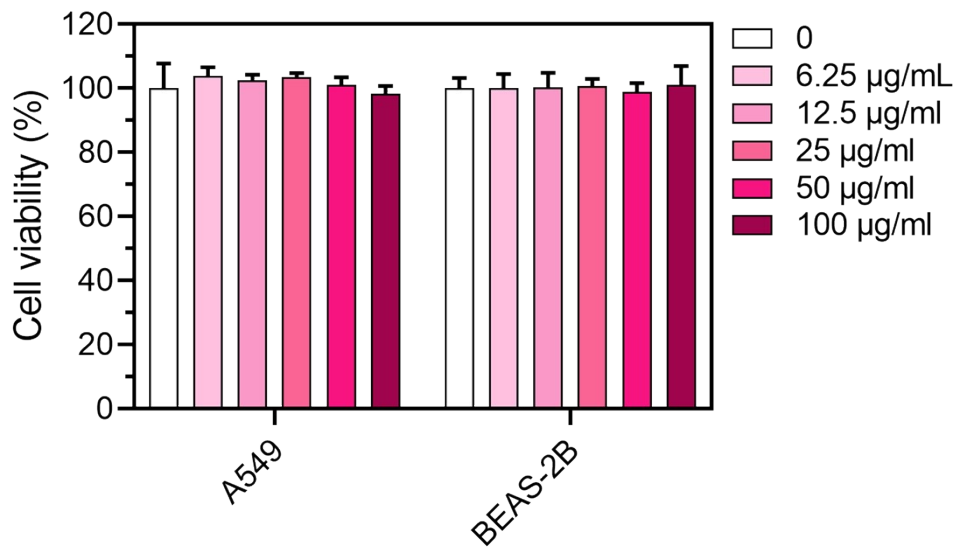

**Fig. S8.** Cell viability of A549 cells and BEAS-2B cells after co-incubation with various concentrations of AMP for 48 h.

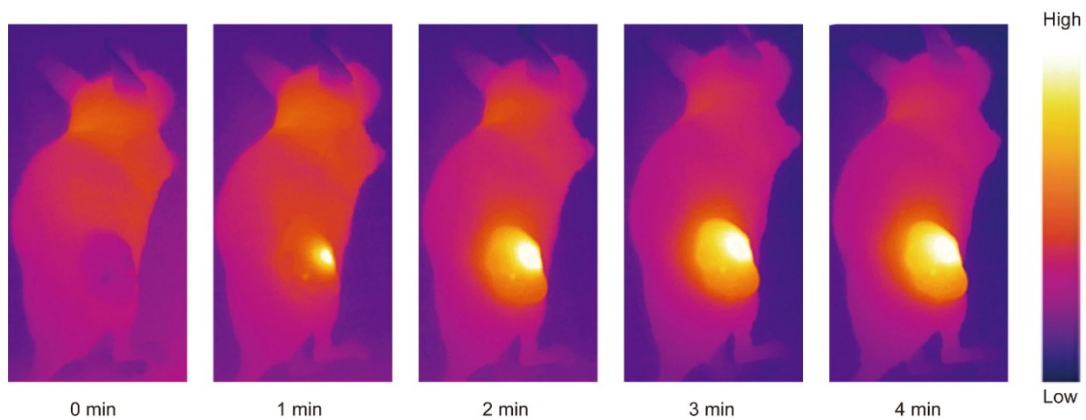

**Fig. S9.** Corresponding infrared thermal images (1064 nm laser doses:  $1.0 \text{ W cm}^{-2}$ )

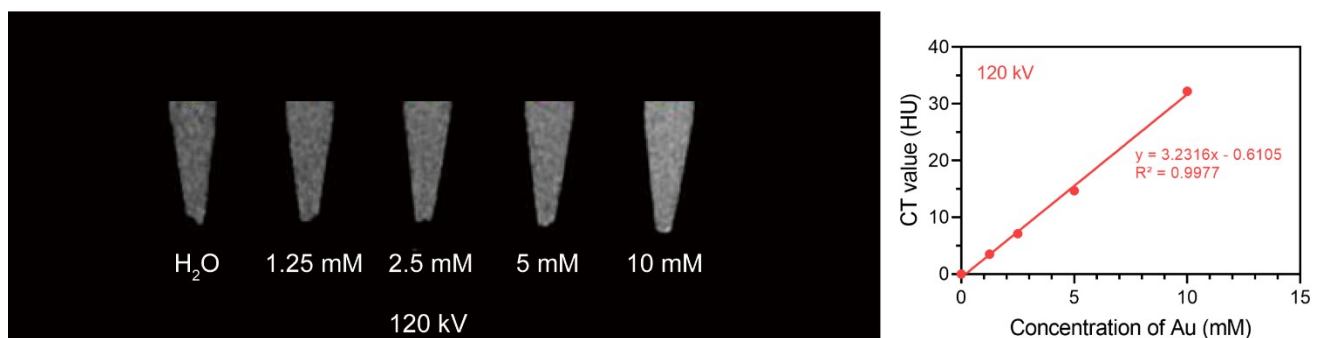

**Fig. S10.** CT images of different concentrations of AMP at 120kV (left) and corresponding CT value (right).

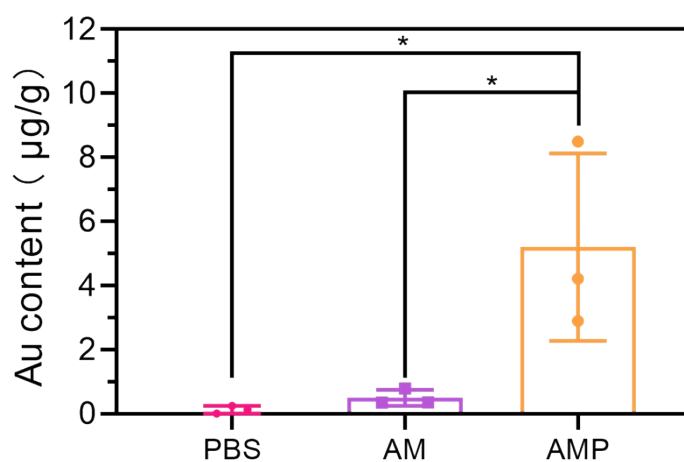

**Fig. S11.** The bioaccumulation of Au in tumor tissue in PBS, AM and AMP groups. \*P < 0.05.

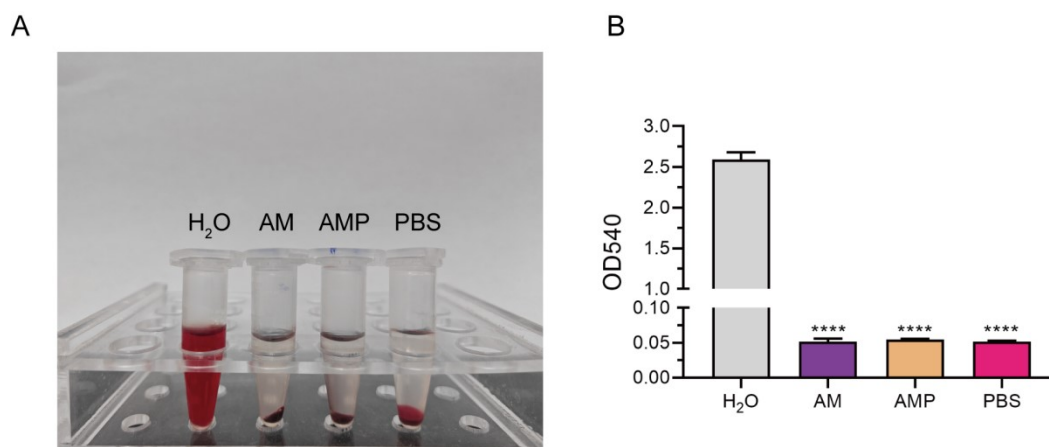

**Fig. S12.** (A) Photograph of the RBC solution incubated with 100µg mL<sup>-1</sup> of AM or AMP. The H<sub>2</sub>O group and PBS group were used as positive and negative control group, respectively. (B) Absorbance at 540 nm of the supernatants of different groups solution. \*\*\*\*P < 0.0001.



**Table S1.** Photothermal performance of recently reported photothermal agents employed in NIR-II window.

| Photothermal agents                  | PTCE  | Photothermal agents                                                             | PTCE  |
|--------------------------------------|-------|---------------------------------------------------------------------------------|-------|
| AMPs (this work)                     | 0.520 | Ti <sub>3</sub> C <sub>2</sub> /CA <sub>4</sub> @PLEL nanohydrogel <sup>1</sup> | 0.414 |
| Au/Ag NRs <sup>2</sup>               | 0.288 | Au-Au nanocoral <sup>3</sup>                                                    | 0.672 |
| Au NPL@TiO <sub>2</sub> <sup>4</sup> | 0.420 | anti-STR-CO-GNSs <sup>5</sup>                                                   | 0.319 |
| Au@MOF-DOX <sup>6</sup>              | 0.302 | PLNP-Bi <sub>2</sub> S <sub>3</sub> <sup>7</sup>                                | 0.44  |
| Au NSs <sup>8</sup>                  | 0.130 | TA-Si-Au <sup>9</sup>                                                           | 0.241 |

PTCE, photothermal conversion efficiency.

1 Tao, N. *et al.* Minimally Invasive Antitumor Therapy Using Biodegradable Nanocomposite Micellar Hydrogel with Functionalities of NIR-II Photothermal Ablation and Vascular Disruption. *ACS Appl Bio Mater* **3**, 4531-4542, doi:10.1021/acsabm.0c00465 (2020).

2 Mei, Z. *et al.* Activatable NIR-II photoacoustic imaging and photochemical synergistic therapy of MRSA infections using miniature Au/Ag nanorods. *Biomaterials* **251**, 120092, doi:10.1016/j.biomaterials.2020.120092 (2020).

3 Jia, J. *et al.* Fine - Tuning the Homometallic Interface of Au - on - Au Nanorods and Their Photothermal Therapy in the NIR - II Window. *Angewandte Chemie International Edition* **59**, 14443-14448, doi:10.1002/anie.202000474 (2020).

4 Gao, F. *et al.* Titania-coated 2D gold nanoplates as nanoagents for synergistic photothermal/sonodynamic therapy in the second near-infrared window. *Nanoscale* **11**, 2374-2384, doi:10.1039/c8nr07188h (2019).

5 Manivasagan, P. *et al.* Antibody-conjugated and streptomycin-chitosan oligosaccharide-modified gold nanoshells for synergistic chemo-photothermal therapy of drug-resistant bacterial infection. *J Adv Res* **48**, 87-104, doi:10.1016/j.jare.2022.08.009 (2023).

6 Deng, X. *et al.* Yolk-Shell Structured Au Nanostar@Metal-Organic Framework for Synergistic Chemo-photothermal Therapy in the Second Near-Infrared Window. *Nano Letters* **19**, 6772-6780, doi:10.1021/acs.nanolett.9b01716 (2019).

7 Meng, Y. *et al.* Photothermal conversion performance and acid-induced aggregation of PLNP-Bi(2)S(3) composite nanoplateforms. *Dalton Trans* **51**, 5285-5295, doi:10.1039/d1dt04215g (2022).

8 Song, C. *et al.* Gold nanostars for cancer cell-targeted SERS-imaging and NIR light-triggered plasmonic photothermal therapy (PPTT) in the first and second biological windows. *Journal of Materials Chemistry B* **7**, 2001-2008, doi:10.1039/c9tb00061e (2019).

9 Sun, L. N. *et al.* Silicon nanowires decorated with gold nanoparticles via in situ reduction for photoacoustic imaging-guided photothermal cancer therapy. *Journal of Materials Chemistry B* **7**, 4393-4401, doi:10.1039/c9tb00147f (2019).
